# Supplementary material
Source: publisher site journal article supplement (https://www.dovepress.com/article/325813)
Supplement: Supplementary file 1 [file get_supplementary_file.php]

***NUDT15* c.415C>T polymorphism predicts 6-MP induced early myelotoxicity in ALL patients undergoing maintenance therapy**

Aswin Anand Pai1, Ajith Mohan1, Esther Sathya Bama Benjamin R1, Raveen Stephen Stallon Illangeswaran1, Infencia Xavier Raj1, Nancy Beryl Janet1, Arun Kumar Arunachalam1, Kavitha ML1, Uday Kulkarni1, Anup J Devasia1, Fouzia NA1, Aby Abraham1, Alok Srivastava1, Biju George1, Vikram Mathews1, Anu Korula1, Poonkuzhali Balasubramanian1

1Department of Haematology, Christian Medical College, Vellore

**Correspondence:**

Poonkuzhali Balasubramanian

Professor

Department of Haematology

Christian Medical College- Vellore

Email: bpoonkuzhali@cmcvellore.ac.in

ORCID ID : 0000-0002-9443-439X

**Keywords**: Leukemia, Mercaptopurine, Myelotoxicity, Pharmacogenomics

**Table S1: Comparison of baseline characteristics between patients enrolled in study (cohort-2) with total patients on maintenance therapy diagnosed at the centre but not enrolled due to inclusion criteria.**

| **Baseline characteristics** | **Patients not enrolled**  **(n=107)** | **Prospective cohort (n=133)** | **P-value** |
| --- | --- | --- | --- |
| **Age at Diagnosis** | *13 (1-61)* | *17 (1-63)* | *0.729* |
| **BSA (m2)** | *1.28 (0.49-2.03)* | *1.5 (0.4-2.1)* | *0.309* |
| **Sex**  Male  Female | *73 (68.2)*  *34 (31.8)* | *88 (66.2)*  *45 (33.8)* | *0.783* |
| **Immunophenotype**  B cell  T cell  BP-ALL  MP-ALL  ETP-ALL  NA | *78 (72.9)*  *22 (20.6)*  *1 (0.9)*  *-*  *2 (1.9)*  *4 (3.7)* | *111 (83.6)*  *20 (15)*  *-*  *1 (0.8)*  *-*  *1 (0.8)* | *0.135* |
| **Cytogenetics Risk**  Favourable  Intermediate  Poor  NA | *17 (15.9)*  *63 (58.9)*  *22 (20.6)*  *05 (4.6)* | *25 (18.8)*  *81 (60.9)*  *7 (5.3)*  *20 (15)* | *0.389* |
| **ALL Risk**  Standard Risk  Intermediate Risk  High Risk  NA | *12 (11.2)*  *61 (57)*  *12 (11.2)*  *22 (20.6)* | *20 (15)*  *70 (52.6)*  *5 (3.8)*  *38 (28.6)* | *0.246* |

**Table S2: Allele and genotype frequencies screened in the present study (cohort-2; N=133)**

| **S. No** | **Gene Polymorphisms** | **Allele frequency (%)** | **Genotype frequency (%)** |
| --- | --- | --- | --- |
| **1** | *NUDT15* c.415C>T, rs116855232 | C-93 & T-7 | CC-86.5 & CT-13.5 |
| **2** | *TPMT* c.719A>G, rs1142345 | A-98 & T-2 | AA-96.9 & AT-3.1 |
| **3** | *ITPA* c.94 C>A, rs1127354 | C-87 & T-13 | CC-76.4, CA-22.0 & AA-1.6 |
| **4** | *MRP4* c.2269 C>T, rs3765534 | C-93 & T-7 | CC-87.6 CT-10.7 & TT-1.7 |

**Table S3: Distribution of variant allele frequencies of *NUDT15, MRP4, ITPA* and *TPMT* genes across different studies in different ethnicities**

| **S.no** | **Ethnicity (n)** | ***NUDT15* c.415C>T**  **rs116855232** | ***TPMT*** **c.719A>G**  **rs1142345** | ***ITPA***  **c.94 C>A**  **rs1127354** | ***MRP4***  **c.2269 C>T**  **rs3765534** | **Reference** |
| --- | --- | --- | --- | --- | --- | --- |
| 1. | Guatemala(159) | *5%* | - | - | - | [5] |
| Singapore (79) | 12% | - | - | - |
| Japan (32) | 17% | - | - | - |
| 2 | Middle East (210) | 0.4% | 1% | 3% | - | [22] |
| 3 | China (105) | 16% | 3% | 18% | - | [25] |
| 4 | Japan (95) | 16% | 2% | 16% | 13% | [40] |
| 5 | Denmark (132) | - | 5% | 3% | - | [41] |
| 6 | Serbia (68) | 3% | - | - | - | [42] |
| 7 | Thailand (110) | 12% | - | - | - | [43] |
| 8 | Taiwan (294) | 13% | 2% | 19% | 4% | [44] |
| 9 | India (73) | 9% | 1% | - | - | [14] |
| 10 | India (63) | 5% | 2% | - | - | [15] |
| 11 | MedGenome Labs Pvt Ltd, India | 7% | 2% | 10% | 6% | *** |
| 12 | NIBMG, India | 6% | 2% | 9% | 6% | *** |
| 13 | Present study (133) | 7% | 2% | 10% | 7% | *Present study*  *(Cohort-2)* |

*- Variant allelic frequency in Indian Population provided by Dr. Partha Majumdar (NIBMG, Kalyani) and Dr. Ram Prasad (MedGenome Laboratories, Bengaluru)- Personal communication.

**Figure S1: Associations between Myelotoxicity and *TPMT**3C (A), *ITPA* 94C > A (B) polymorphisms**

**
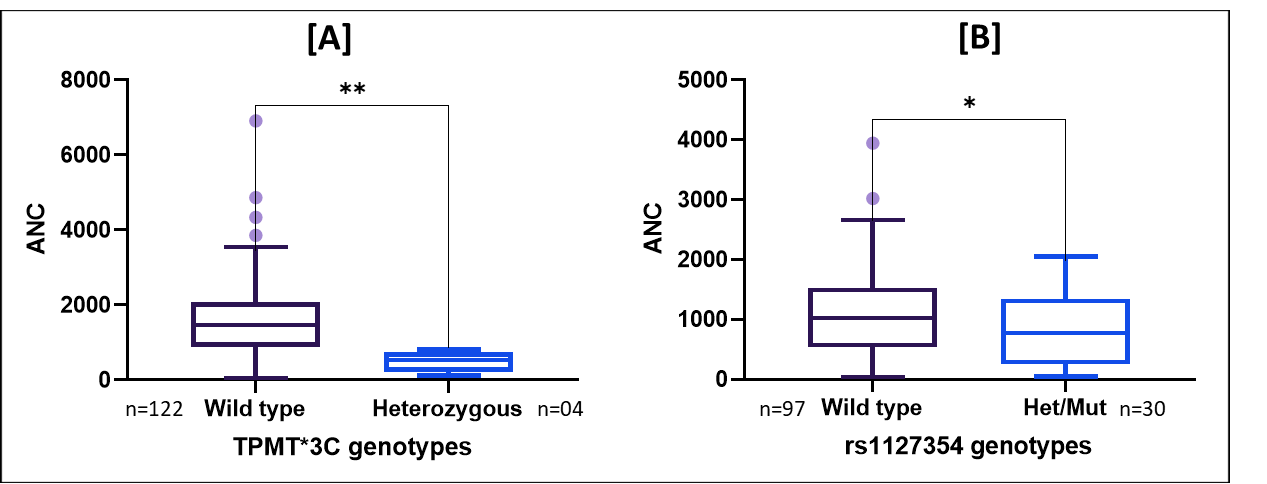
**

**Figure S2: Kaplan-Meier survival curves showing associations between *NUDT15* c.415C>T (A) and *TPMT**3C polymorphism (B) with Relapse free survival**

**
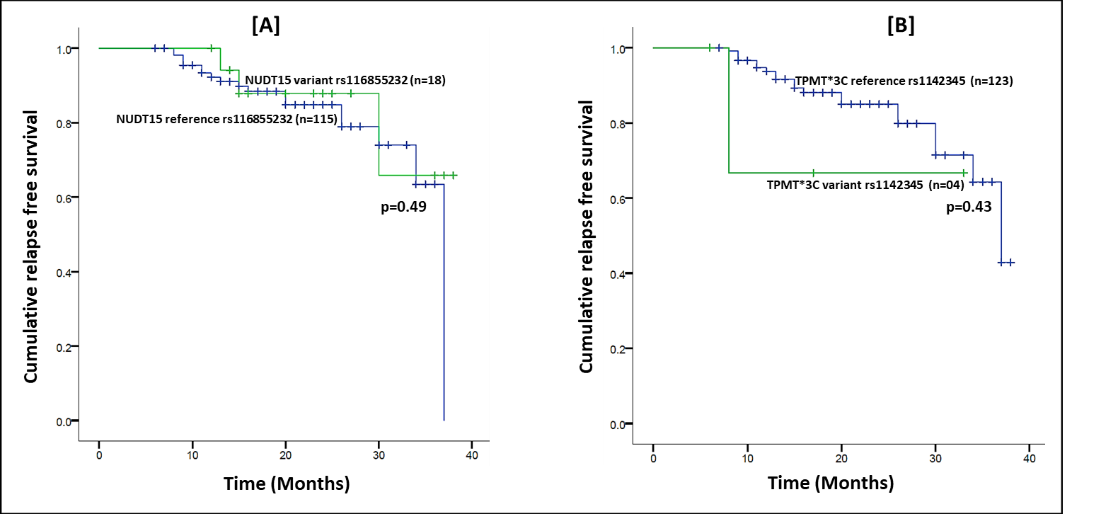
**
